# Supplementary material for: RNF168, a new RING finger, MIU-containing protein that modifies chromatin by ubiquitination of histones H2A and H2AX
Source: Springer Nature journal article supplement (doi:10.1186/1471-2199-10-55), 2009-06-05

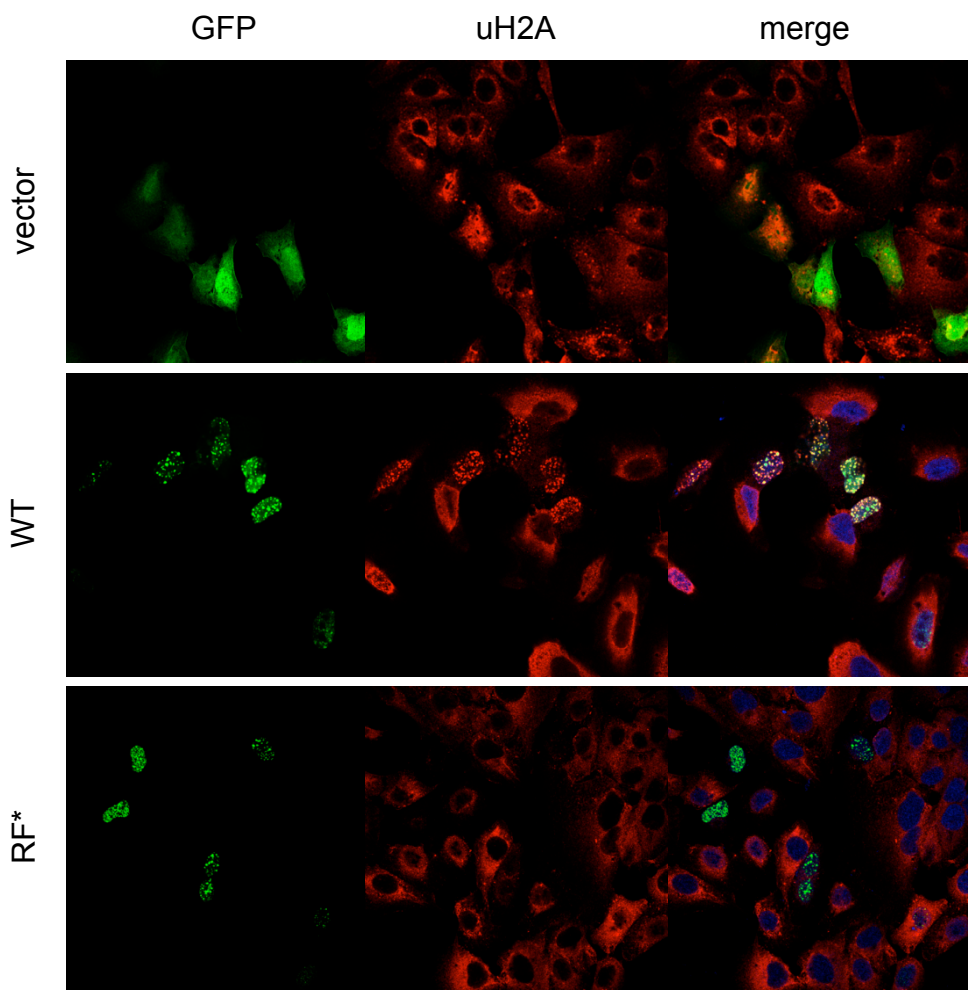

Supplement: 12867_2009_423_MOESM2_ESM.pdf [file 12867_2009_423_MOESM2_ESM.pdf]
