# Supplementary material for: RNF168, a new RING finger, MIU-containing protein that modifies chromatin by ubiquitination of histones H2A and H2AX
Source: Springer Nature journal article supplement (doi:10.1186/1471-2199-10-55), 2009-06-05

**A**

|            |   |   |   |   |
|------------|---|---|---|---|
| E1         | + | + | + | + |
| E2 UbcH5c  | + | + | + | - |
| Ub         | + | + | + | + |
| GST        | + | - | - | - |
| RNF168 WT  | - | + | - | + |
| RNF168 RF* | - | - | + | - |

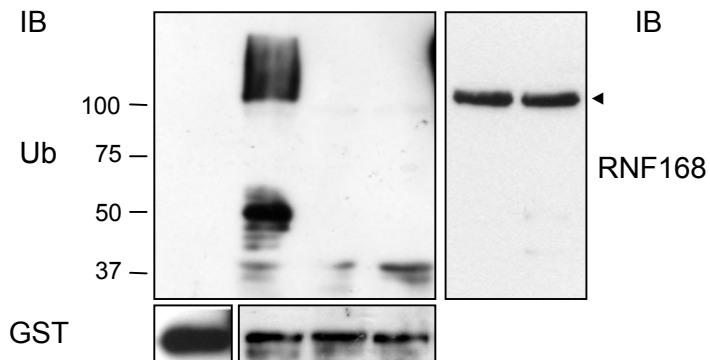**B**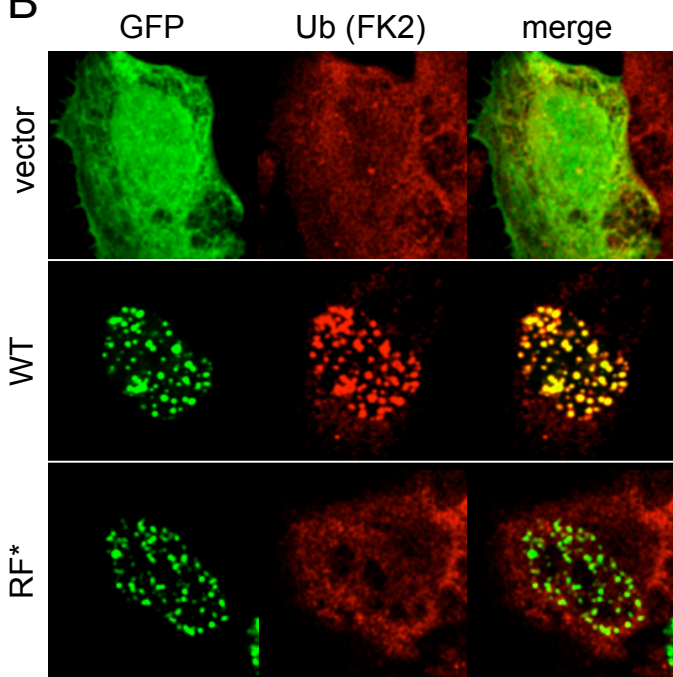**C**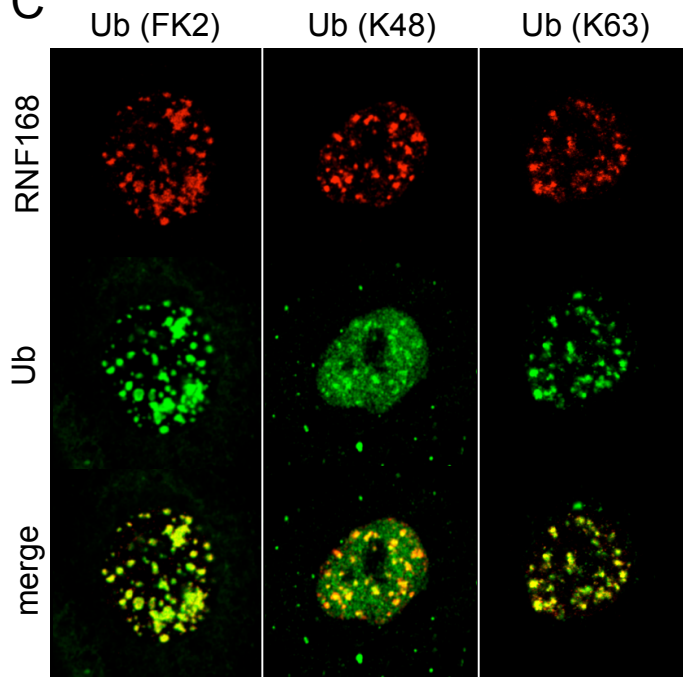

Supplement: 12867_2009_423_MOESM4_ESM.pdf [file 12867_2009_423_MOESM4_ESM.pdf]
